# Supplementary material
Source: PubMed Central journal article supplement (PMC3374622)
Supplement: supp_11-9414_IOVS-11-9414-s01.pdf [file supp_11-9414_IOVS-11-9414-s01.pdf]

## SUPPLEMENTAL MATERIALS

| <b>Table 1. Materials Used for Cell Culturing and Isolation</b> |                                |                                                               |
|-----------------------------------------------------------------|--------------------------------|---------------------------------------------------------------|
| <b>Materials</b>                                                | <b>Sources</b>                 | <b>Concentration</b>                                          |
| Dulbecco's modified Eagle's Medium (DMEM)                       | Invitrogen, Grand Island, NY   | DMEM/F-12 (1:1)                                               |
| F-12 nutrient mixture (F-12)                                    | Invitrogen, Grand Island, NY   | DMEM/F-12 (1:1)                                               |
| Knockout Serum Replacement                                      | Invitrogen, Grand Island, NY   | 10%                                                           |
| Human Fibroblast Growth Factor-Basic                            | Invitrogen, Grand Island, NY   | 4 ng/ml                                                       |
| Leukemia inhibitory factor (LIF)                                | Invitrogen, Grand Island, NY   | 10ng/ml                                                       |
| Vascular Endothelial Growth Factor                              | PrompCell, Heidelberg, Germany | 10ng/ml                                                       |
| Dimethyl Sulfoxide                                              | Sigma-Aldrich, St. Louis, MO   | 0.5%                                                          |
| L-glutamine                                                     | Invitrogen, Grand Island, NY   | 1 mM                                                          |
| Cholera Toxin                                                   | Sigma-Aldrich, St. Louis, MO   | 1 nM                                                          |
| Hydrocortisone                                                  | Sigma-Aldrich, St. Louis, MO   | 5 µg/ml                                                       |
| Insulin-Transferrin-sodium selenite media supplement            | Roche, Indianapolis, IN        | 5 µg/ml insulin, 5 µg/ml Transferrin, 5 ng/ml sodium selenite |
| Hank's Balanced Salt Solutions (HBSS)                           | Invitrogen, Grand Island, NY   | 1x                                                            |
| Phosphate-Buffered Saline pH7.4 (PBS)                           | Invitrogen, Grand Island, NY   | 1x                                                            |
| Amphotericin B                                                  | Invitrogen, Grand Island, NY   | 50 µg/ml                                                      |
| Gentamicin                                                      | Invitrogen, Grand Island, NY   | 1.25 µg/ml                                                    |
| DispaseII                                                       | Roche, Indianapolis, IN        | 10mg/ml                                                       |
| Collagenase A                                                   | Roche, Indianapolis, IN        | 2 mg/ml                                                       |
| Trypsin and EDTA(T/E)                                           | Invitrogen, Grand Island, NY   | 0.25% and 1mM                                                 |
| Matrigel™ Basement Membrane Matrix                              | BD Biosciences                 | 100%                                                          |
| 5-ethynyl-2'-deoxyuridine (EdU)                                 | Invitrogen, Eugene, OR         | 10 µM                                                         |
| Qdot® nanocrystals (Qtracker)                                   | Invitrogen, Eugene, OR         | 10nM                                                          |
| DiIAcLDL † (L3484)                                              | Invitrogen, Eugene, OR         | 10 µg/ml                                                      |

| <b>Table 2: Antibodies Used for Immunofluorescence Staining (IF) and Western Blotting (WB)</b> |                               |                               |
|------------------------------------------------------------------------------------------------|-------------------------------|-------------------------------|
| <b>Antibodies</b>                                                                              | <b>Sources</b>                | <b>Dilution</b>               |
| Pan-cytokeratins (AE1/AE3) (PCK)                                                               | Dako (Carpinteria, CA)        | 1:100                         |
| Vimentin (SP20)                                                                                | Abcam (Cambridge, MA)         | 1:100                         |
| Oct-4                                                                                          | Millipore (Billerica, MA)     | 1:100                         |
| Sox2                                                                                           | Abcam (Cambridge, MA)         | 1:100                         |
| Flk-1                                                                                          | Cell Signaling (Danvers, MA)  | 1:100                         |
| CD34                                                                                           | Abcam (Cambridge, MA)         | 1:100                         |
| CD31                                                                                           | Cell Signaling (Danvers, MA)  | 1:100                         |
| $\alpha$ -SMA                                                                                  | Abcam (Cambridge, MA)         | 1:50                          |
| PDGFR $\beta$                                                                                  | Abcam (Cambridge, MA)         | 1:100                         |
| vWF                                                                                            | Abcam (Cambridge, MA)         | 1:200                         |
| Cytokeratin 12 (L-20)                                                                          | Santa Cruz (Santa Cruz, CA)   | 1:50 for IF<br>1:500 for WB   |
| p63 $\alpha$                                                                                   | Cell Signaling (Danvers, MA)  | 1:100 for IF<br>1:1000 for WB |
| SMMHC                                                                                          | Thermo (Rockford, IL)         | 1:100                         |
| S100A4                                                                                         | Abcam (Cambridge, MA)         | 1:100                         |
| $\beta$ -actin                                                                                 | Sigma-Aldrich (St. Louis, MO) | 1: 3000                       |
| Alexa Fluor 488 anti–mouse IgG                                                                 | Invitrogen (Carlsbad, CA)     | 1:100                         |
| Alexa Fluor 555 anti–Rabbit IgG                                                                | Invitrogen (Carlsbad, CA)     | 1:100                         |
| Alexa Fluor 633 anti–Goat IgG                                                                  | Invitrogen (Carlsbad, CA)     | 1:100                         |
| Polyclonal Rabbit<br>Anti-Mouse Immunoglobulins/HRP                                            | Dako (Carpinteria, CA)        | 1:1000                        |
| Polyclonal Swine<br>Anti-Rabbit Immunoglobulins/HRP                                            | Dako (Carpinteria, CA)        | 1:1000                        |
| Polyclonal Rabbit<br>Anti-Goat Immunoglobulins/HRP                                             | Dako (Carpinteria, CA)        | 1:1000                        |
| Hoechst 33342                                                                                  | Sigma-Aldrich (St. Louis, MO) | 1:1000                        |

| <b>Table 3. Assay ID and Probes Sequence Use for Real-time PCR</b> |                                                                           |           |                |
|--------------------------------------------------------------------|---------------------------------------------------------------------------|-----------|----------------|
| Gene Name                                                          | Assay ID<br>(Taqman Expression Assay)                                     | UniID     | Product Length |
| GAPDH                                                              | Hs02758991_g1                                                             | Hs.598320 | 93             |
| Oct-4                                                              | Hs00999634_gH                                                             | Hs.249184 | 64             |
| Sox2                                                               | Hs01053049_s1                                                             | Hs.518438 | 91             |
| Flk-1                                                              | Hs00911700_m1                                                             | Hs.479756 | 83             |
| CD34                                                               | Hs00990734_g1                                                             | Hs.374990 | 101            |
| CD31                                                               | Hs00169777_m1                                                             | Hs.376675 | 65             |
| $\alpha$ -SMA                                                      | Hs00426835_g1                                                             | Hs.500483 | 105            |
| PDGFR $\beta$                                                      | Hs01019589_m1                                                             | Hs.509067 | 62             |
| $\Delta$ Np63 $\alpha$                                             | Forward: GGCTGTTCATCATGTCTGGACTATT<br>Reverse: CATCCATGGAGTAATGCTCAATCTGA |           | 78             |
| CK15                                                               | Hs00267035_m1                                                             | Hs.654570 | 81             |
| CEBP $\delta$                                                      | Hs00270931_s1                                                             | Hs.440829 | 107            |
| CK12                                                               | Hs01057907_m1                                                             | Hs.66739  | 71             |
| SMMHC                                                              | Hs00224610_m1                                                             | Hs.460109 | 78             |
| S100A4                                                             | Hs00243202_m1                                                             | Hs.654444 | 101            |
